# Supplementary material for: The Pitfalls of Review Solicitation: Evidence from a Natural Experiment on TripAdvisor
Source: Atypon-hosted journal article supplement (doi:10.1287/mnsc.2023.01006), 2024-05-16
Supplement: mnsc.2023.01006.sm1.pdf [file mnsc.2023.01006.sm1.pdf]

# The Pitfalls of Review Solicitation: Evidence from a Natural Experiment on TripAdvisor

## Online Appendix

Baojun Gao,<sup>a</sup> Jing Wang,<sup>b</sup> Xiaojie Ding,<sup>c</sup> Yue Guo<sup>d</sup>

<sup>a</sup> Department of Management Science and Engineering, Economics and Management School, Wuhan University, Wuhan 430072, China

<sup>b</sup> Department of Information Systems, Business Statistics, and Operations Management, School of Business and Management, Hong Kong University of Science and Technology, Hong Kong, China

<sup>c</sup> School of Management, Wuhan Textile University, Wuhan 430000, China

<sup>d</sup> College of Business, Southern University of Science and Technology, Shenzhen 518055, China

### Section A. Figures and Tables

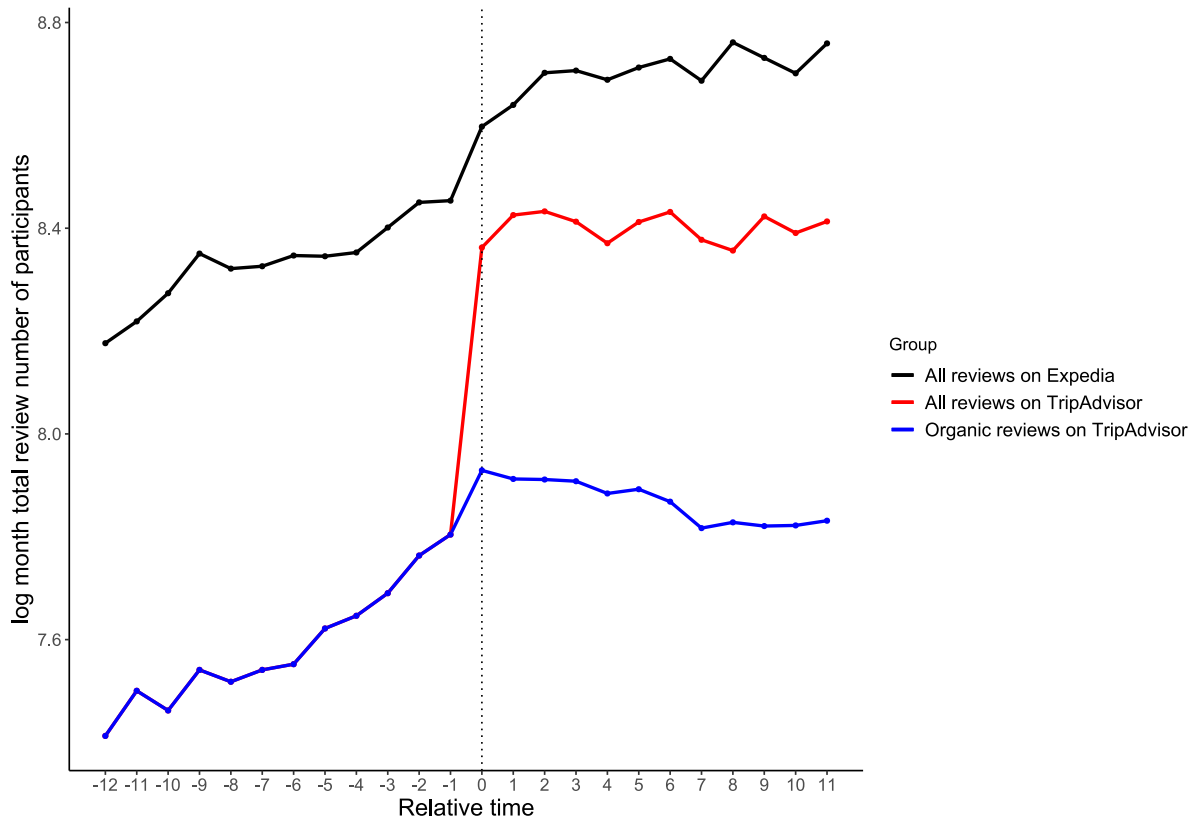

Figure A1. Number of Reviews for Participating Hotels on TripAdvisor and Expedia in Relative Time

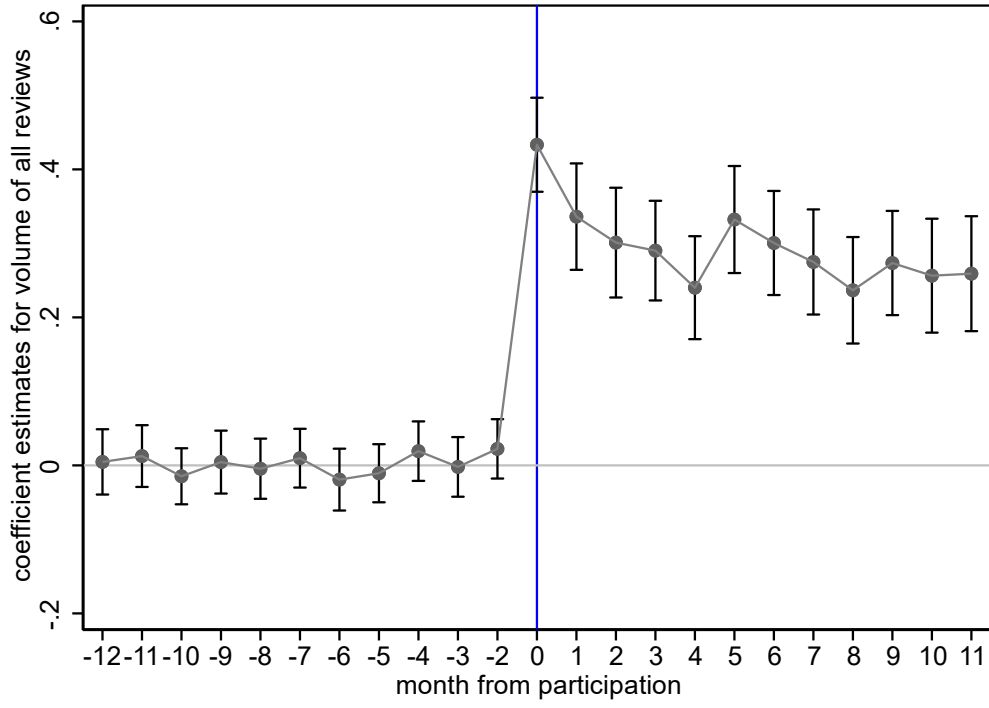

(a) Volume

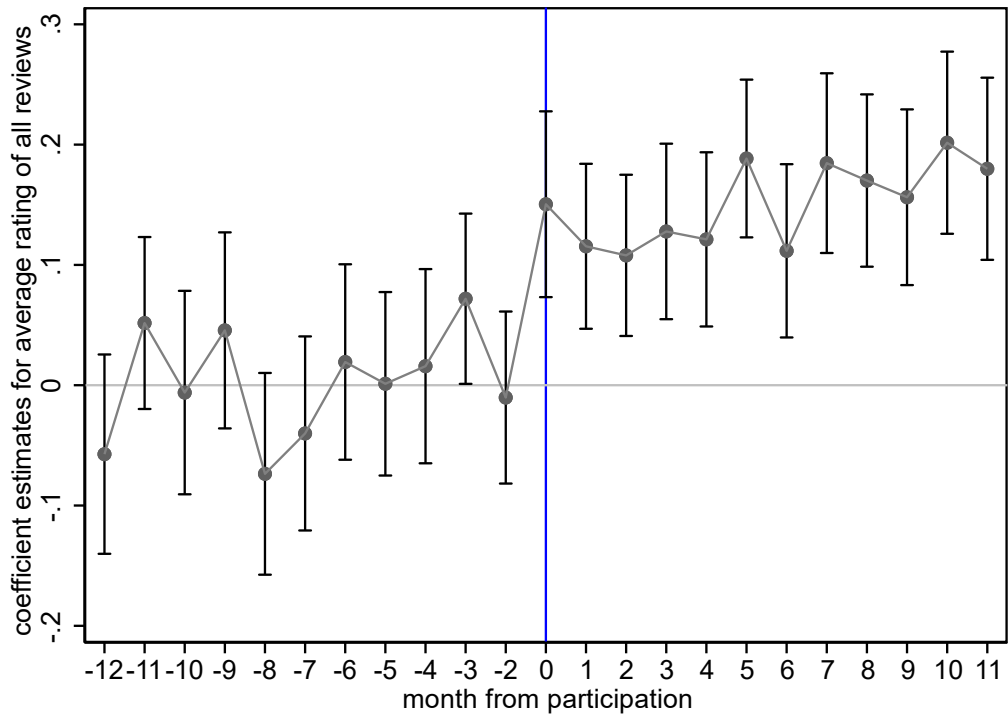

(b) Average Rating

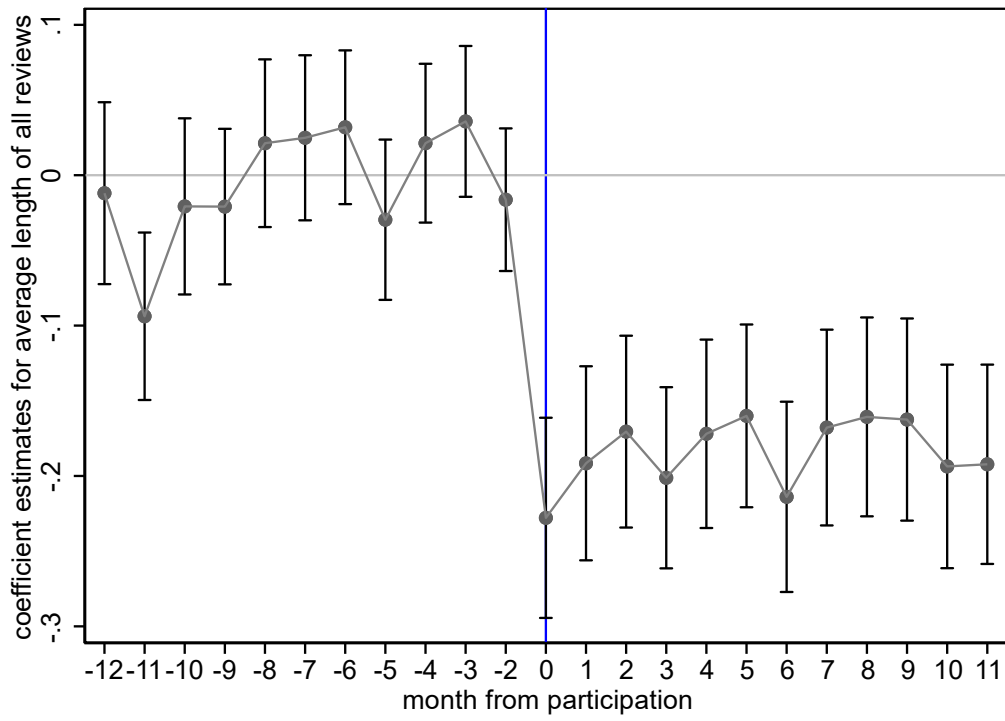

(c) Average Length

Figure A2. Treatment Effects Over Time Relative to One Month before Treatment (All Reviews)

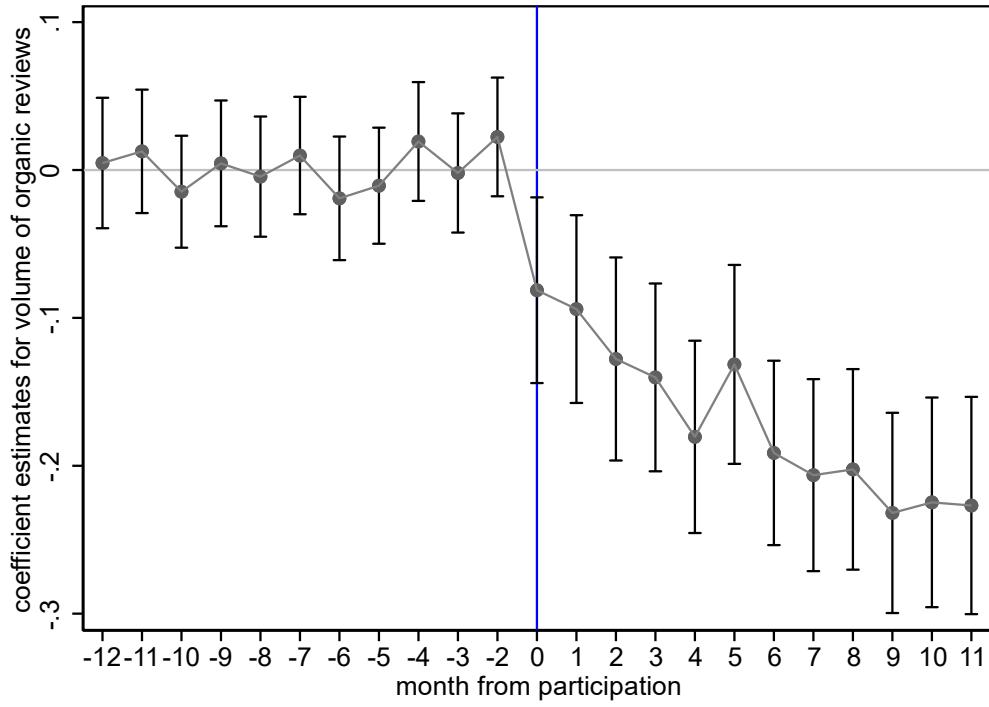

(a) Volume

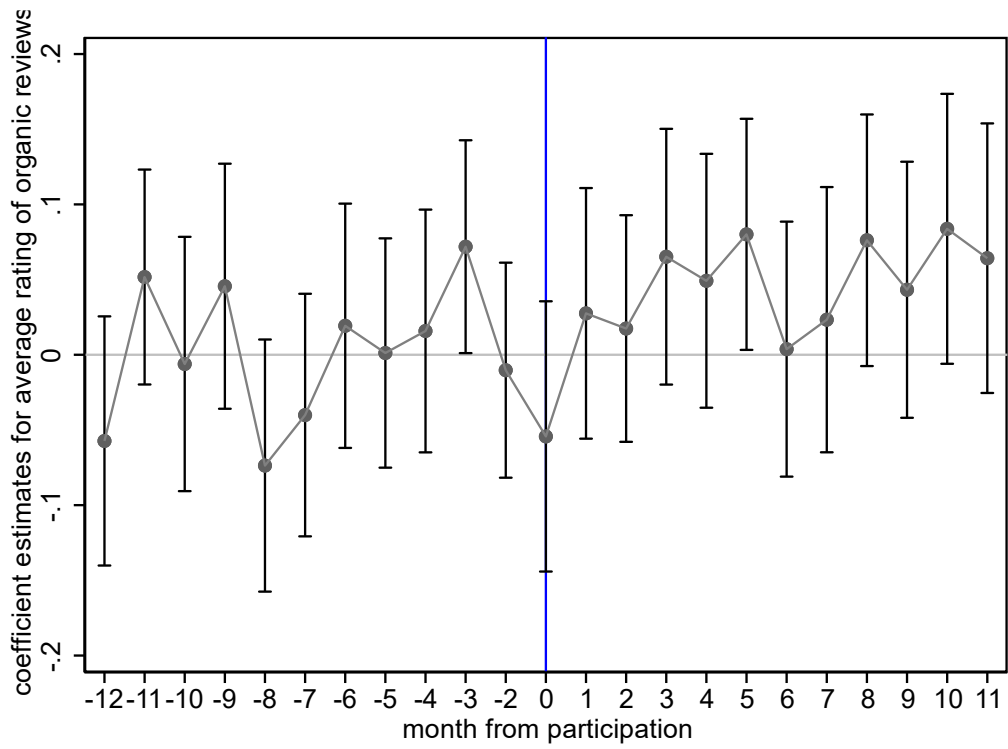

(b) Average Rating

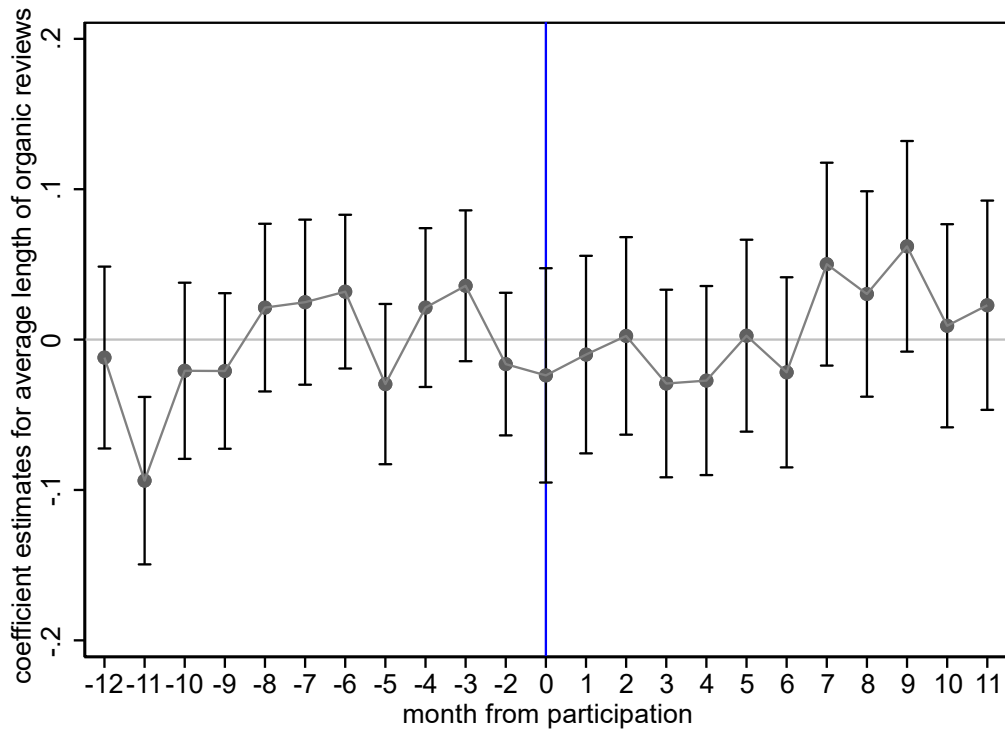

(c) Average Length

**Figure A3. Treatment Effects Over Time Relative to One Month before Treatment (Organic Reviews)**

**Table A1. The Effect of Review Solicitation on All Reviews, Using Only Hotels with Data of Full 12 Months Before and After the Participation (Two-Stage DID)**

|                                   | <i>Dependent variable</i> |                          |                               |
|-----------------------------------|---------------------------|--------------------------|-------------------------------|
|                                   | <i>log(Volume)</i><br>(1) | <i>Avg_Rating</i><br>(2) | <i>log(Avg_length)</i><br>(3) |
| <i>After</i> × <i>TripAdvisor</i> | 0.293***<br>(0.030)       | 0.160***<br>(0.024)      | -0.153***<br>(0.026)          |
| <i>TripAdvisor</i>                | Yes                       | Yes                      | Yes                           |
| <i>After</i>                      | Yes                       | Yes                      | Yes                           |
| Hotel fixed effects               | Yes                       | Yes                      | Yes                           |
| Year-month fixed effects          | Yes                       | Yes                      | Yes                           |
| Observations                      | 19,632                    | 16,770                   | 16,663                        |

*Notes:* 1. Clustered robust standard errors at the hotel level are in parentheses. 2. \*, \*\*, and \*\*\* indicate significance at the 0.05, 0.01, and 0.001 level, respectively. 3. The average length includes only English-language reviews.

**Table A2. The Effect of Review Solicitation on Organic Reviews, Using Only Hotels with Data of Full 12 Months Before and After the Participation (Two-Stage DID)**

|                                   | <i>Dependent variable</i> |                          |                               |
|-----------------------------------|---------------------------|--------------------------|-------------------------------|
|                                   | <i>log(Volume)</i><br>(1) | <i>Avg_Rating</i><br>(2) | <i>log(Avg_length)</i><br>(3) |
| <i>After</i> × <i>TripAdvisor</i> | -0.151***<br>(0.025)      | 0.046<br>(0.024)         | 0.030<br>(0.025)              |
| <i>TripAdvisor</i>                | Yes                       | Yes                      | Yes                           |
| <i>After</i>                      | Yes                       | Yes                      | Yes                           |
| Hotel fixed effects               | Yes                       | Yes                      | Yes                           |
| Year-month fixed effects          | Yes                       | Yes                      | Yes                           |
| Observations                      | 19,632                    | 16,190                   | 16,060                        |

*Notes:* 1. Clustered robust standard errors at the hotel level are in parentheses. 2. \*, \*\*, and \*\*\* indicate significance at the 0.05, 0.01, and 0.001 level, respectively. 3. The average length includes only English-language reviews.

**Table A3. The Effect of Review Solicitation on All Reviews, Using Only Hotels Whose First Solicited Reviews were Collected in Partnership with Themselves (Two-Stage DID)**

|                                   | <i>Dependent variable</i> |                          |                               |
|-----------------------------------|---------------------------|--------------------------|-------------------------------|
|                                   | <i>log(Volume)</i><br>(1) | <i>Avg_Rating</i><br>(2) | <i>log(Avg_length)</i><br>(3) |
| <i>After</i> × <i>TripAdvisor</i> | 0.414***<br>(0.036)       | 0.189***<br>(0.028)      | -0.255***<br>(0.032)          |
| <i>TripAdvisor</i>                | Yes                       | Yes                      | Yes                           |
| <i>After</i>                      | Yes                       | Yes                      | Yes                           |
| Hotel fixed effects               | Yes                       | Yes                      | Yes                           |
| Year-month fixed effects          | Yes                       | Yes                      | Yes                           |
| Observations                      | 16,295                    | 13,851                   | 13,767                        |

*Notes:* 1. Clustered robust standard errors at the hotel level are in parentheses. 2. \*, \*\*, and \*\*\* indicate significance at the 0.05, 0.01, and 0.001 level, respectively. 3. The average length includes only English-language reviews.

**Table A4. The Effect of Review Solicitation on Organic Reviews, Using Only Hotels Whose First Solicited Reviews were Collected in Partnership with Themselves (Two-Stage DID)**

|                                   | <i>Dependent variable</i> |                          |                               |
|-----------------------------------|---------------------------|--------------------------|-------------------------------|
|                                   | <i>log(Volume)</i><br>(1) | <i>Avg_Rating</i><br>(2) | <i>log(Avg_length)</i><br>(3) |
| <i>After</i> × <i>TripAdvisor</i> | -0.187***<br>(0.033)      | 0.045<br>(0.029)         | -0.013<br>(0.030)             |
| <i>TripAdvisor</i>                | Yes                       | Yes                      | Yes                           |
| <i>After</i>                      | Yes                       | Yes                      | Yes                           |
| Hotel fixed effects               | Yes                       | Yes                      | Yes                           |
| Year-month fixed effects          | Yes                       | Yes                      | Yes                           |
| Observations                      | 16,295                    | 13,244                   | 13,141                        |

*Notes:* 1. Clustered robust standard errors at the hotel level are in parentheses. 2. \*, \*\*, and \*\*\* indicate significance at the 0.05, 0.01, and 0.001 level, respectively. 3. The average length includes only English-language reviews.

**Table A5. The Effect of Review Solicitation on All Reviews, Chain Hotels Only (Two-Stage DID)**

|                                   | <i>Dependent variable</i> |                          |                               |
|-----------------------------------|---------------------------|--------------------------|-------------------------------|
|                                   | <i>log(Volume)</i><br>(1) | <i>Avg_Rating</i><br>(2) | <i>log(Avg_length)</i><br>(3) |
| <i>After</i> × <i>TripAdvisor</i> | 0.285***<br>(0.033)       | 0.120***<br>(0.024)      | -0.202***<br>(0.028)          |
| <i>TripAdvisor</i>                | Yes                       | Yes                      | Yes                           |
| <i>After</i>                      | Yes                       | Yes                      | Yes                           |
| Hotel fixed effects               | Yes                       | Yes                      | Yes                           |
| Year-month fixed effects          | Yes                       | Yes                      | Yes                           |
| Observations                      | 18,744                    | 16,247                   | 16,149                        |

*Notes:* 1. Clustered robust standard errors at the hotel level are in parentheses. 2. \*, \*\*, and \*\*\* indicate significance at the 0.05, 0.01, and 0.001 level, respectively. 3. The average length includes only English-language reviews.

**Table A6. The Effect of Review Solicitation on Organic Reviews, Chain Hotels Only (Two-Stage DID)**

|                                   | <i>Dependent variable</i> |                          |                               |
|-----------------------------------|---------------------------|--------------------------|-------------------------------|
|                                   | <i>log(Volume)</i><br>(1) | <i>Avg_Rating</i><br>(2) | <i>log(Avg_length)</i><br>(3) |
| <i>After</i> × <i>TripAdvisor</i> | -0.189***<br>(0.030)      | 0.031<br>(0.024)         | -0.004<br>(0.026)             |
| <i>TripAdvisor</i>                | Yes                       | Yes                      | Yes                           |
| <i>After</i>                      | Yes                       | Yes                      | Yes                           |
| Hotel fixed effects               | Yes                       | Yes                      | Yes                           |
| Year-month fixed effects          | Yes                       | Yes                      | Yes                           |
| Observations                      | 18,744                    | 15,767                   | 15,648                        |

*Notes:* 1. Clustered robust standard errors at the hotel level are in parentheses. 2. \*, \*\*, and \*\*\* indicate significance at the 0.05, 0.01, and 0.001 level, respectively. 3. The average length includes only English-language reviews.

**Table A7. The Effect of Review Solicitation on All Reviews, with Review Environment Control Variables (Two-Stage DID)**

|                                   | <i>Dependent variable</i> |                          |                               |
|-----------------------------------|---------------------------|--------------------------|-------------------------------|
|                                   | <i>log(Volume)</i><br>(1) | <i>Avg_Rating</i><br>(2) | <i>log(Avg_length)</i><br>(3) |
| <i>After</i> × <i>TripAdvisor</i> | 0.189***<br>(0.028)       | 0.126***<br>(0.023)      | -0.198***<br>(0.026)          |
| <i>TripAdvisor</i>                | Yes                       | Yes                      | Yes                           |
| <i>After</i>                      | Yes                       | Yes                      | Yes                           |
| <i>log(Cum_Volume)</i>            | Yes                       | Yes                      | Yes                           |
| <i>Cum_Avg_Rating</i>             | Yes                       | Yes                      | Yes                           |
| <i>log(Cum_Avg_length)</i>        | Yes                       | Yes                      | Yes                           |
| Hotel fixed effects               | Yes                       | Yes                      | Yes                           |
| Year-month fixed effects          | Yes                       | Yes                      | Yes                           |
| Observations                      | 23,196                    | 19,969                   | 19,847                        |

*Notes:* 1. Clustered robust standard errors at the hotel level are in parentheses. 2. \*, \*\*, and \*\*\* indicate significance at the 0.05, 0.01, and 0.001 level, respectively. 3. The average length includes only English-language reviews.

**Table A8. The Effect of Review Solicitation on Organic Reviews, with Review Environment Control Variables (Two-Stage DID)**

|                                   | <i>Dependent variable</i> |                          |                               |
|-----------------------------------|---------------------------|--------------------------|-------------------------------|
|                                   | <i>log(Volume)</i><br>(1) | <i>Avg_Rating</i><br>(2) | <i>log(Avg_length)</i><br>(3) |
| <i>After</i> × <i>TripAdvisor</i> | -0.164***<br>(0.026)      | 0.029<br>(0.022)         | 0.010<br>(0.023)              |
| <i>TripAdvisor</i>                | Yes                       | Yes                      | Yes                           |
| <i>After</i>                      | Yes                       | Yes                      | Yes                           |
| <i>log(Cum_Volume)</i>            | Yes                       | Yes                      | Yes                           |
| <i>Cum_Avg_Rating</i>             | Yes                       | Yes                      | Yes                           |
| <i>log(Cum_Avg_length)</i>        | Yes                       | Yes                      | Yes                           |
| Hotel fixed effects               | Yes                       | Yes                      | Yes                           |
| Year-month fixed effects          | Yes                       | Yes                      | Yes                           |
| Observations                      | 23,179                    | 19,303                   | 19,157                        |

*Notes:* 1. Clustered robust standard errors at the hotel level are in parentheses. 2. \*, \*\*, and \*\*\* indicate significance at the 0.05, 0.01, and 0.001 level, respectively. 3. The average length includes only English-language reviews.

**Table A9. The Effect of Review Solicitation on All Reviews, Using DDD Model (Two-Stage DID)**

|                                            | <i>Dependent Variable</i> |                          |                               |
|--------------------------------------------|---------------------------|--------------------------|-------------------------------|
|                                            | <i>log(Volume)</i><br>(1) | <i>Avg_Rating</i><br>(2) | <i>log(Avg_Length)</i><br>(3) |
| <i>After × TripAdvisor × Participating</i> | 0.295***<br>(0.029)       | 0.154***<br>(0.022)      | -0.185***<br>(0.025)          |
| <i>TripAdvisor</i>                         | Yes                       | Yes                      | Yes                           |
| <i>After × Participating</i>               | Yes                       | Yes                      | Yes                           |
| <i>TripAdvisor × Participating</i>         | Yes                       | Yes                      | Yes                           |
| Hotel fixed effects                        | Yes                       | Yes                      | Yes                           |
| Year-month fixed effects                   | Yes                       | Yes                      | Yes                           |
| Observations                               | 96,644                    | 62,702                   | 61,916                        |

Notes: 1. Clustered robust standard errors at the hotel level are in parentheses. 2. \*, \*\*, and \*\*\* indicate significance at the 0.05, 0.01, and 0.001 level, respectively. 3. The average length includes only English-language reviews.

**Table A10. The Effect of Review Solicitation on Organic Reviews, Using DDD Model (Two-Stage DID)**

|                                            | <i>Dependent Variable</i> |                          |                               |
|--------------------------------------------|---------------------------|--------------------------|-------------------------------|
|                                            | <i>log(Volume)</i><br>(1) | <i>Avg_Rating</i><br>(2) | <i>log(Avg_Length)</i><br>(3) |
| <i>After × TripAdvisor × Participating</i> | -0.169***<br>(0.026)      | 0.045*<br>(0.022)        | 0.004<br>(0.023)              |
| <i>TripAdvisor</i>                         | Yes                       | Yes                      | Yes                           |
| <i>After × Participating</i>               | Yes                       | Yes                      | Yes                           |
| <i>TripAdvisor × Participating</i>         | Yes                       | Yes                      | Yes                           |
| Hotel fixed effects                        | Yes                       | Yes                      | Yes                           |
| Year-month fixed effects                   | Yes                       | Yes                      | Yes                           |
| Observations                               | 96,644                    | 62,036                   | 61,226                        |

Notes: 1. Clustered robust standard errors at the hotel level are in parentheses. 2. \*, \*\*, and \*\*\* indicate significance at the 0.05, 0.01, and 0.001 level, respectively. 3. The average length includes only English-language reviews.

**Table A11. The Effect of Review Solicitation on All Reviews Posted by Organic Reviewers Who Were Active Before the Policy Change (Two-Stage DID)**

|                                   | <i>Dependent variable</i> |                          |                               |
|-----------------------------------|---------------------------|--------------------------|-------------------------------|
|                                   | <i>log(Volume)</i><br>(1) | <i>Avg_Rating</i><br>(2) | <i>log(Avg_length)</i><br>(3) |
| <i>After</i> × <i>TripAdvisor</i> | -0.356***<br>(0.026)      | 0.031<br>(0.024)         | -0.006<br>(0.024)             |
| <i>TripAdvisor</i>                | Yes                       | Yes                      | Yes                           |
| <i>After</i>                      | Yes                       | Yes                      | Yes                           |
| Hotel fixed effects               | Yes                       | Yes                      | Yes                           |
| Year-month fixed effects          | Yes                       | Yes                      | Yes                           |
| Observations                      | 23,350                    | 17,077                   | 16,998                        |

*Notes:* 1. Clustered robust standard errors at the hotel level are in parentheses. 2. \*, \*\*, and \*\*\* indicate significance at the 0.05, 0.01, and 0.001 level, respectively. 3. The average length includes only English-language reviews.

**Table A12. The Effect of Review Solicitation on All Reviews Posted by Organic Reviewers Based on Majority (Two-Stage DID)**

|                                   | <i>Dependent variable</i> |                          |                               |
|-----------------------------------|---------------------------|--------------------------|-------------------------------|
|                                   | <i>log(Volume)</i><br>(1) | <i>Avg_Rating</i><br>(2) | <i>log(Avg_length)</i><br>(3) |
| <i>After</i> × <i>TripAdvisor</i> | -0.084***<br>(0.026)      | 0.080***<br>(0.021)      | -0.047*<br>(0.024)            |
| <i>TripAdvisor</i>                | Yes                       | Yes                      | Yes                           |
| <i>After</i>                      | Yes                       | Yes                      | Yes                           |
| Hotel fixed effects               | Yes                       | Yes                      | Yes                           |
| Year-month fixed effects          | Yes                       | Yes                      | Yes                           |
| Observations                      | 23,350                    | 19,491                   | 19,352                        |

*Notes:* 1. Clustered robust standard errors at the hotel level are in parentheses. 2. \*, \*\*, and \*\*\* indicate significance at the 0.05, 0.01, and 0.001 level, respectively. 3. The average length includes only English-language reviews.

**Section B. Shift in Review Topics**

**B.1. STM**

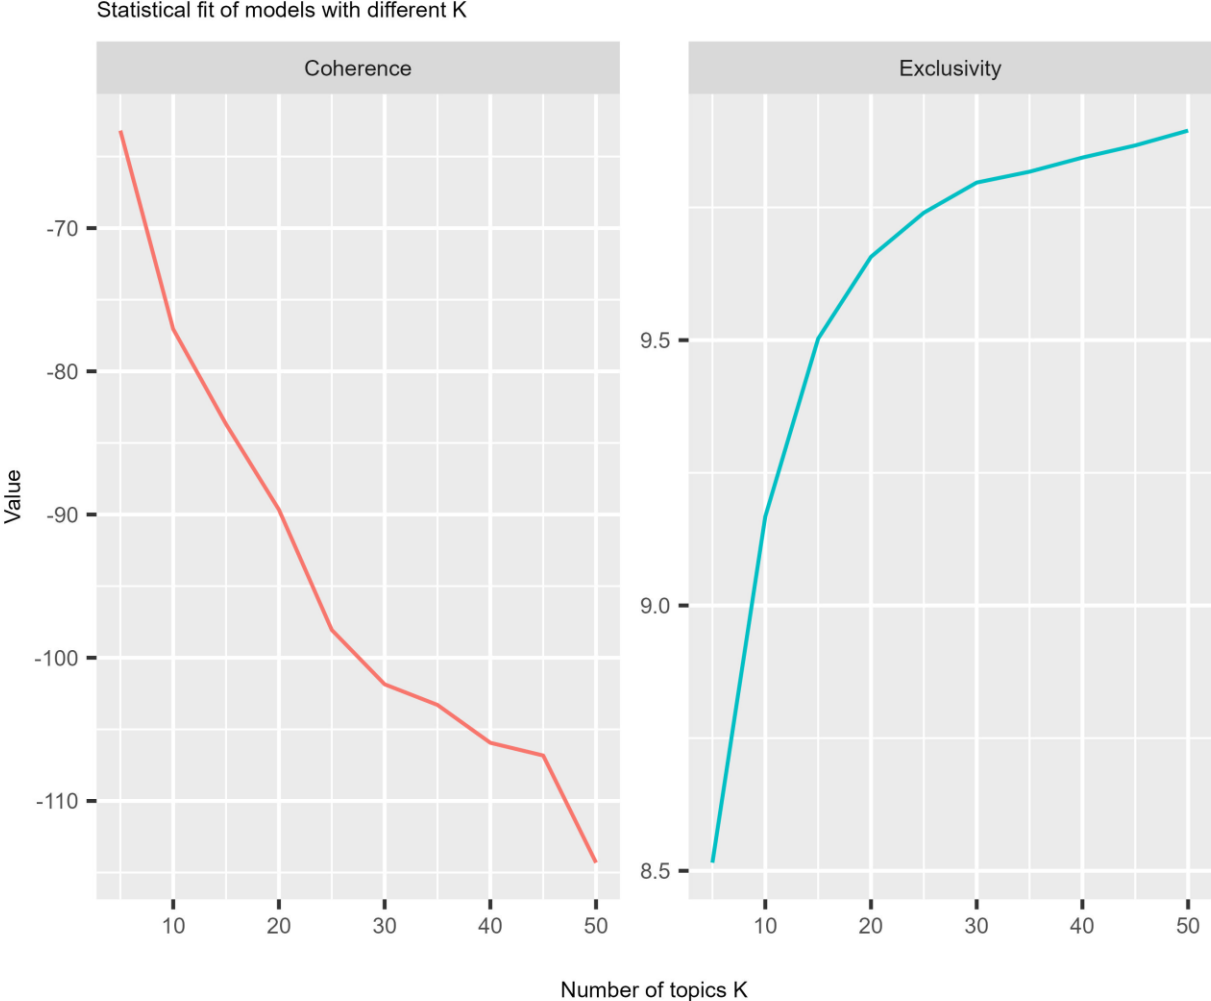

**Figure B1. Model Diagnostics by Number of Topics**

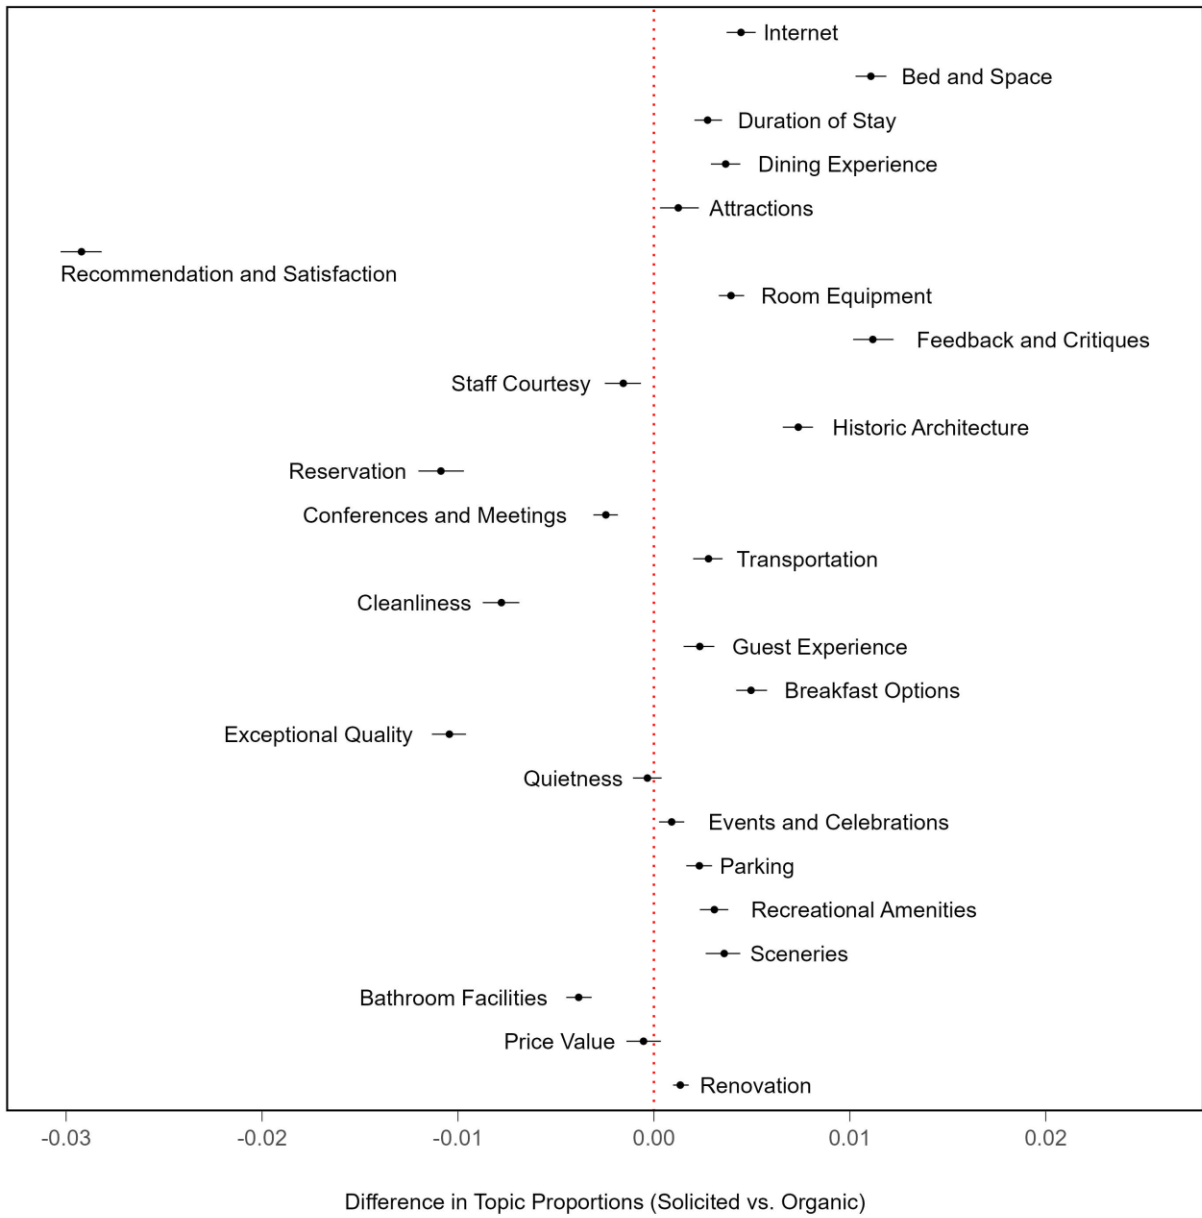

**Figure B2. Difference in the Topic Proportions (Organic – Solicited; Direct Effect)**

**Table B1. The 25 Topics and Their Top Words**

| Topic Label                     | Top Words                                                                                | Proportion |
|---------------------------------|------------------------------------------------------------------------------------------|------------|
| Recommendation and Satisfaction | recommend, excel, great, definit, antonio, san, high, perfect, wonder, friend            | 9.27%      |
| Bed and Space                   | nice, comfort, bed, comfi, spacious, size, littl, big, king, larg                        | 7.04%      |
| Reservation                     | call, told, card, phone, credit, said, reserv, final, later, apolog                      | 6.20%      |
| Staff Courtesy                  | help, polit, courteous, everyon, profession, front, smile, alway, will, job              | 6.09%      |
| Exceptional Quality             | custom, omni, notch, exceed, experienc, detail, frequent, servic, attent, season         | 5.11%      |
| Price Value                     | inn, hampton, quinta, valu, price, motel, reason, good, money, budget                    | 4.79%      |
| Feedback and Critiques          | dont, review, somewher, els, saw, let, know, guess, wouldnt, stuff                       | 4.58%      |
| Internet                        | internet, average, slow, standard, wifi, fine, limit, lack, marriott, decent             | 4.43%      |
| Attractions                     | galleria, shop, dalla, mall, within, west, nearbi, downtown, houston, museum             | 4.19%      |
| Duration of Stay                | suit, year, embassi, week, bedroom, live, last, month, past, homewood                    | 4.14%      |
| Sceneries                       | river, austin, alamo, walk, street, riverwalk, capitol, congress, across, block          | 3.94%      |
| Breakfast Options               | buffet, egg, complimentari, fruit, sausag, varieti, omelet, snack, bacon, fresh          | 3.91%      |
| Guest Experience                | hyatt, club, home, treat, rememb, feel, welcom, thank, regenc, grand                     | 3.59%      |
| Quietness                       | hear, nois, loud, sound, construct, sleep, noisi, pet, door, neighbor                    | 3.46%      |
| Cleanliness                     | smoke, smell, stain, carpet, dirti, sheet, mold, musti, odor, cigarett                   | 3.21%      |
| Transportation                  | airport, shuttl, graduat, driver, highway, termin, lackland, dfw, freeway, road          | 2.95%      |
| Events and Celebrations         | wed, late, arriv, saturday, earli, friday, sunday, arrang, parti, group                  | 2.88%      |
| Parking                         | park, car, garag, valet, self, per, fee, vehicl, cost, entranc                           | 2.83%      |
| Recreational Amenities          | resort, spa, golf, kid, swim, hill, pool, outdoor, activ, relax                          | 2.67%      |
| Dining Experience               | westin, anniversari, server, bartend, waiter, ate, celebr, menu, champagn, chef          | 2.64%      |
| Historic Architecture           | histor, histori, charm, menger, adolphus, driskil, rooftop, indigo, architectur, boutiqu | 2.60%      |
| Bathroom Facilities             | shower, pressur, water, tub, temperatur, condition, drain, degre, bath, air              | 2.60%      |
| Room Equipment                  | microwav, fridg, maker, coffe, machin, refriger, cup, screen, flat, iron                 | 2.46%      |
| Conferences and Meetings        | convent, confer, center, meet, medic, hilton, anatol, fit, execut, toyota                | 2.41%      |
| Renovation                      | renov, updat, need, remodel, improv, older, properti, major, complet, appear             | 2.03%      |

## B.2. Alternative Explanation

We posit that the shift in review topics could potentially be attributed to a lower level of intrinsic motivation among reviewers when composing solicited reviews. However, the finding that solicited reviews are more abstract could also be attributed to an alternative explanation that these reviews are written after a greater delay. As the construal level theory (CLT) posits, individuals tend to conceptualize temporally distant events in a more abstract and high-level manner (Trope and Liberman 2010).

To explore this possibility, we examine whether there is a greater delay between the date of review and the date of stay for solicited reviews. We noted that on TripAdvisor, while the review date is made public, only the year and month of the stay are disclosed. As a result, we are unable to directly gauge the difference between these two dates. As an alternative approach, we assess the difference between the year and month of the review posting and those of the hotel stay. Specifically, we check the percentage of reviews that were posted in the same month as the stay, the next month following the stay, and two or more months after the stay. As presented in Table B2, the percentage of solicited reviews posted in the same month as the stay is substantially higher than that of organic reviews (83.70% vs. 69.72%). On the other hand, the percentage of solicited reviews posted in two or more months after the stay is significantly lower than that of organic reviews (0.43% vs. 10.57%). Taken together, these results suggest that the interval between the time of the stay and the review appears to be shorter for solicited reviews. Therefore, it is unlikely that the observed topical disparities between solicited reviews and organic reviews can be explained by the timing difference in review writing.

**Table B2. Difference Between Review Posting and Hotel Stay**

|                                     | Organic Reviews (%) | Solicited Reviews (%) |
|-------------------------------------|---------------------|-----------------------|
| Reviews posted in the same month    | 69.74%              | 83.77%                |
| Reviews posted in the next month    | 19.69%              | 15.81%                |
| Review posted in two or more months | 10.56%              | 0.42%                 |

## References

Trope, Y., and Liberman, N. (2010). Construal-level theory of psychological distance. *Psychological Review*, 117(2), 440-463.
